# Supplementary material
Source: PubMed Central journal article supplement (PMC2847355)
Supplement: NIHMS181721-supplement-01.pdf [file NIHMS181721-supplement-01.pdf]

## INVENTORY OF SUPPLEMENTAL INFORMATION

### Structural Rules and Complex Regulatory Circuitry Constrain Expression of a Notch- and EGFR-Regulated Eye Enhancer

Christina I. Swanson, Nicole C. Evans, and Scott Barolo

#### SUPPLEMENTAL DATA

**Table S1** provides GFP expression data from all transgenic lines examined.

These data, requested by reviewers, are relevant to Figures 2 through 6.

**Table S2** presents EMSA competition data discussed in the text, relevant to the conclusions drawn from Figure 2 in that they support the notion that the newly mapped regulatory sequences do not merely augment binding of the known regulators to their binding sites.

**Figure S1** presents expression data discussed in the text, relevant to the proposal, related to Figure 5, that the Su(H)+Ets+Lz sites in *spa* are “poised” for activation in multiple cell types in the eye.

**Table S3** summarizes evolutionary conservation analyses of *spa* and six other developmental enhancers, related to Figure 6 and discussed in the text. These data show that, although overall sequence conservation of *spa* is not unusual, this enhancer has relatively few blocks of contiguous conserved sequence. This is an interesting observation, given that we have shown that *spa* is very intolerant of experimental sequence alterations and rearrangements.

#### SUPPLEMENTAL EXPERIMENTAL PROCEDURES

#### SUPPLEMENTAL REFERENCES

## **SUPPLEMENTAL INFORMATION**

### **Structural Rules and Complex Regulatory Circuitry Constrain Expression of a Notch- and EGFR-Regulated Eye Enhancer**

Christina I. Swanson, Nicole C. Evans, and Scott Barolo

#### **SUPPLEMENTAL DATA**

**Figure S1**

**Table S1**

**Table S2**

**Table S3**

#### **SUPPLEMENTAL EXPERIMENTAL PROCEDURES**

#### **SUPPLEMENTAL REFERENCES**

## SUPPLEMENTAL DATA

### Figure S1, A Synthetic Version of *spa*, Containing Only Su(H)+Lz+Ets Binding Sites, Is Poised for Activation in Multiple Cell Types of the Developing Eye (related to Figure 5)

*spa*(synth<sup>NS</sup>), a synthetic enhancer containing the Su(H)+Lz+Ets sites from *spa* in their native arrangement, placed at -846 bp upstream of a promoter, is inactive in all cell types of the eye, in all 8 lines examined (A). When this construct was placed closer to the promoter (-121 bp), no expression was observed in 5 of 7 independent transgenic lines (B). However, 2 of 7 lines show insertion site-dependent activity in the eye: one line is active in cone cells, as shown by co-expression with Cut (C), while another line is active in multiple photoreceptors, as shown by co-expression with Elav (D).

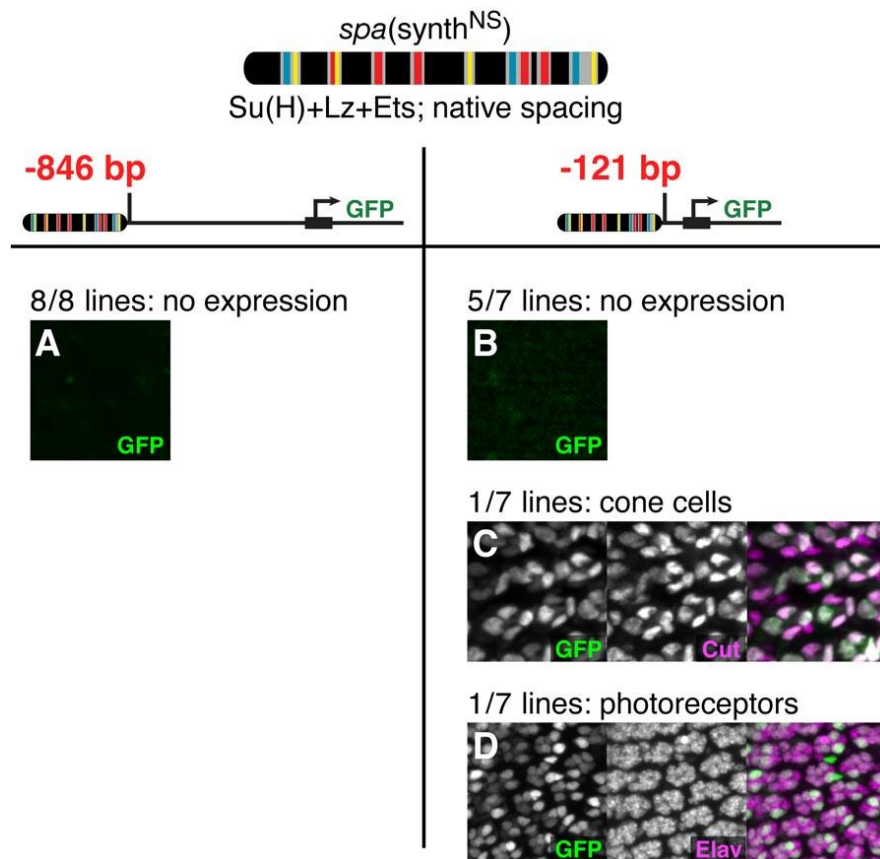

**Table S1, Summary of Transgenic Reporter Expression Data (related to Figures 2-5)**

Data are presented in a separate Excel file.

All constructs are placed at -846 bp from promoter, except those labeled “-121,” which are placed at -121 bp. CC, cone cell expression; PR, photoreceptor 1+6 expression. 3 to 14 independently derived transgenic lines were examined for each construct. See Figure 2 for scoring key. Asterisks on lines of *spa*(synth<sup>CS</sup>) and *2xspa*(synth<sup>CS</sup>) denote lines with weak and incomplete R1+R6 expression, plus weak-to-moderate expression at the posterior margin of the eye disc, which, based on z-position and nuclear size, is likely to include peripodial cells.

**Table S2, Novel Regulatory Regions of *spa* Do Not Significantly Contribute to In Vitro Binding of the Known Regulatory TFs (related to Figure 2)**

Experimental details and probe sequences are described in Supplemental Experimental Procedures. Probes include novel regulatory regions 1, 4, 5, or 6a, plus any immediately flanking Lz, Su(H), or Ets binding sites (see Figure 6A for annotated sequence). Left, Lz binding to sites flanking regions 1, 5, and 6a; Right, Su(H) binding to sites flanking regions 4 and 6a. Pnt binding was not examined, because the predicted Ets sites flanking these enhancer regions do not bind Pnt in vitro (Flores et al., 2000).

In all cases, mutations to novel regulatory regions of *spa* (all of which reduce enhancer activity in vivo) do not significantly affect binding of Lz or Su(H) to nearby sites. By contrast, binding is reduced in all cases by mutating the Lz or Su(H) sites themselves (red figures).

Note that mutating Su(H) sites has a milder effect on binding than mutating Lz sites, and that a greater excess of competitor is required for Su(H) than for Lz. This apparent difference in relative binding strength is consistent with the fact that the Lz sites perfectly match the optimal binding consensus, while the Su(H) sites deviate from the optimal consensus and are predicted to be lower-affinity sites (Flores et al., 2000; Nellesen et al., 1999).

| Lz binding in vitro<br>(given as % competition) |            |             | Su(H) binding in vitro<br>(given as % competition) |             |             |
|-------------------------------------------------|------------|-------------|----------------------------------------------------|-------------|-------------|
| cold competitor<br>fold excess:                 | 10x        | 100x        | cold competitor<br>fold excess:                    | 100x        | 1000x       |
| <b><u>Region 1:</u></b>                         |            |             | <b><u>Region 4:</u></b>                            |             |             |
| 1 wt                                            | 32.8       | 74.2        | 4 wt                                               | 33.8        | 69.8        |
| <b>1 mBS</b>                                    | <b>1.1</b> | <b>1.2</b>  | <b>4 mBS</b>                                       | <b>21.0</b> | <b>63.0</b> |
| m1a                                             | 36.8       | 72.7        | m4a                                                | 32.3        | 76.5        |
| m1b                                             | 34.2       | 74.6        | m4b                                                | 25.3        | 73.7        |
| m1c                                             | 39.6       | 71.2        | m4c                                                | 51.1        | 84.3        |
| <b><u>Region 5:</u></b>                         |            |             | <b><u>Region 6a:</u></b>                           |             |             |
| 5 wt                                            | 37.7       | 79.4        | 6a wt                                              | 10.3        | 52.1        |
| <b>5 mBS</b>                                    | <b>5.8</b> | <b>8.9</b>  | <b>6a mBS</b>                                      | <b>8.8</b>  | <b>36.0</b> |
| m5a                                             | 39.5       | 85.4        | m6a                                                | 15.7        | 55.4        |
| m5b                                             | 44.7       | 81.1        |                                                    |             |             |
| m5c                                             | 39.7       | 78.4        |                                                    |             |             |
| <b><u>Region 6a:</u></b>                        |            |             |                                                    |             |             |
| 6a wt                                           | 35.1       | 75.1        |                                                    |             |             |
| <b>6a mBS</b>                                   | <b>5.6</b> | <b>11.5</b> |                                                    |             |             |
| m6a                                             | 44.4       | 72.6        |                                                    |             |             |

**Table S3, *D. melanogaster* - *D. pseudoobscura* sequence identity and blocks of conservation within *spa* and six other developmental enhancers (related to Figure 6)**

| Enhancer                            | Total bp | Conserved bp (%) <sup>a</sup> | 10/10 conserved blocks (%) <sup>b</sup> | 20/20 conserved blocks (%) <sup>b</sup> |
|-------------------------------------|----------|-------------------------------|-----------------------------------------|-----------------------------------------|
| <i>E(spl)m4</i> <sup>c</sup>        | 279      | 87.8                          | 74.6                                    | 58.1                                    |
| <i>Su(H)ASE</i> <sup>d</sup>        | 372      | 82.8                          | 63.2                                    | 40.3                                    |
| <i>dppVM</i> <sup>e</sup>           | 419      | 70.9                          | 51.3                                    | 21.7                                    |
| <i>eveMHE</i> <sup>f</sup>          | 311      | 74.3                          | 45.7                                    | 29.3                                    |
| <i>evest.2</i> <sup>g</sup>         | 483      | 73.1                          | 37.7                                    | 19.9                                    |
| <i>dppD</i> <sup>h</sup>            | 372      | 69.6                          | 36.5                                    | 26.1                                    |
| mean±SEM<br>(excluding <i>spa</i> ) |          | 76.4±3.0                      | 51.5 ±6.1                               | 32.6±5.9                                |
| <i>spa</i> <sup>i</sup>             | 362      | 64.6                          | 3.9                                     | 0                                       |
| mean±SEM<br>(including <i>spa</i> ) |          | 74.7±3.0                      | 44.7 ±8.5                               | 27.9 ±6.8                               |

<sup>a</sup>Derived from BLASTZ alignments of orthologous enhancer sequences. <sup>b</sup>Defined as the total length of contiguous conserved sequences of ≥10 bp or ≥20 bp (counting gaps as mismatched bases) in a BLASTZ alignment, as a percentage of total enhancer length.

<sup>c</sup>Nellesen et al. (1999). <sup>d</sup>Barolo et al. (2000). <sup>e</sup>Sun et al. (1995); Yang et al. (2000); Zaffran et al. (2001); Stultz et al. (2006). <sup>f</sup>Halfon et al. (2000). <sup>g</sup>Small et al. (1992); Arnosti et al. (1996); Andrioli et al. (2002). <sup>h</sup>Müller and Basler (2000). <sup>i</sup>Flores et al. (2000).

## SUPPLEMENTAL EXPERIMENTAL PROCEDURES

### Protein Expression and Purification

Lozenge protein was expressed using the TNT T7 Coupled Reticulocyte Lysate System (Promega) from pET3c-Lz (kindly provided by Richard Mann, Columbia University). His-tagged Su(H) was expressed from pRSET-6XHis-Su(H) (kindly provided by Jim Posakony, University of California, San Diego). RosettaBlue (DE3) Competent Cells (Novagen) transformed with pRSET-6XHis-Su(H) were grown overnight in 250 ml of LB plus 30 µg/ml carbenicillin in a 37°C shaking incubator. The next morning, cells were spun down for 10 min at 6000 rpm, and the pellet was resuspended in 10 ml LB. Two 500 ml LB+carb cultures were each inoculated with 2.5 ml of resuspended cells and grown in a 30°C shaking incubator until they reached an OD<sub>600</sub> of 0.6-0.7. Each 500 ml culture was then induced with 500 µl 1M IPTG and grown at 30°C for an additional 2 hours. Cultures were spun down at 4°C for 10 min at 6000 rpm. Each pellet was resuspended on ice in 10 ml of lysis buffer (0.1 M NaCl, 0.1% Tween-20, 10 mM Tris-Cl (pH 8.0), 5 mM Imidazole, 1 mM DTT, 1 mM PMSF, 1 tablet Complete Mini EDTA-free (Roche)). Cells were lysed at 4°C by sonication (60% power, 5 X 30s, at 30s intervals), then centrifuged for 20 min at 10,000 rpm at 4°C. All following purification steps took place in a 4°C cold room. Two 0.8 X 4 cm Poly-Prep Chromatography Columns (Bio-Rad) were packed with 0.15 ml of Ni-NTA agarose (Qiagen) and cleared with 10 ml Wash Buffer 1 (0.1 M NaCl, 0.1% Tween-20, 10 mM Tris-Cl (pH 8.0), 5 mM Imidazole). Ten ml of supernatant was then applied to each column. Each column was washed with 1 ml Wash Buffer 1, followed by 1 ml Wash Buffer 2 (0.1 M NaCl, 10 mM Tris-Cl (pH 8.0), 15 mM Imidazole). Protein was eluted with 6 X 100 µl elution buffer (0.1 M NaCl, 10 mM Tris-Cl (pH 8.0), 200 mM Imidazole, pH adjusted to 8.0). Elutions containing protein were pooled and glycerol was added to 10% final concentration before being aliquoted, flash frozen with dry ice and ethanol, and stored at -80°C.

### In Vitro Binding Assays

Protein-DNA binding was quantitated in vitro with electrophoretic mobility shift assays (EMSAs); relative affinities were determined by competing unlabeled (“cold”) DNA probes against radiolabeled (“hot”) probes for protein binding. DNA probes were made using custom oligos from either Invitrogen or IDT. Gel shift probe labeling reactions contained 37 µl dH<sub>2</sub>O, 5 µl 10X PNK Buffer, 1 µl top strand oligo (2 µM), 1 µl bottom strand oligo (2 µM), 5 µl γ<sup>32</sup>P, and 1 µl T4 PNK (NEB). Reactions were incubated at 37°C for one hour, boiled at 80°C for 5 min, then allowed to cool slowly to room temperature. Labeled probes were purified twice using Illustra ProbeQuant G-50 Micro Columns (GE). The Lz labeled probe contained the first Lz site from *spa* along with flanking sequence. The Su(H) labeled probe contained the third Su(H) site from *spa* along with flanking sequence. The sequences of labeled probes are below, with Lz sites in blue, Su(H) sites in red, and binding site mutations in bold and underlined:

Lz:                   aaaatttactatGACCGCAaagctgtttcc  
MutLz:               aaaatttactatGAAAGCAaagctgtttcc  
Su(H):               tcaagatcttaTTCACATTgaaattgaagc  
MutSu(H):           tcaagatcttaTTGGGATTgaaattgaagc

Cold competitors were assembled as follows: 10X - 25 µl dH<sub>2</sub>O, 5 µl 10X PNK Buffer, 10 µl top strand oligo (2 µM), 10 µl bottom strand oligo (2 µM); 100X - 43 µl dH<sub>2</sub>O, 5 µl 10X PNK Buffer, 1 µl top strand oligo (200 µM), 1 µl bottom strand oligo (200 µM); 1000X - 25 µl dH<sub>2</sub>O, 5 µl 10X PNK Buffer, 10 µl top strand oligo (200 µM), 10 µl bottom strand oligo (200 µM). Cold competitors were incubated at 37°C for one hour, boiled at 80°C for 5 min, then allowed to cool slowly to room temperature. Sequences of cold competitor probes match the sequences of *in vivo* reporter constructs, and include region of interest along with adjacent binding sites and additional flanking sequence on either side. Sequences of cold competitors are below, with Lz sites in blue, Su(H) sites in red, Ets sites in green, binding site mutations in bold and underlined, and mutations outside binding sites in alternating caps and lower case, where the bases in caps have been mutated by non-complementary transversion:

1\_wt: gtatcaagtaactgggtgcctaattgaaaaaatttactat**GACCGCA**aagctgtttc  
m1a: gGaGcCaTtCactgggtgcctaattgaaaaaatttactat**GACCGCA**aagctgtttc  
m1b: gtatcaagtaacGgTgGgAcGaattgaaaaaatttactat**GACCGCA**aagctgtttc  
m1c: gtatcaagtaactgggtgcctaCtGgCaCaCatttactat**GACCGCA**aagctgtttc  
1\_mBS: gtatcaagtaactgggtgcctaattgaaaaaatttactat**GAAAGCA**aagctgtttc

4\_wt: caagatctta**TTCACATT**gaaattgaagcactattggtgtacgattacaacgctcac-  
attatca**GGAT**tataaaaaaaaa  
m4abc: caagatctta**TTCACATT**gaaaGtTaCgAaAtCtGgTtTtCcTaGtCcCaAgAtAaA-  
aGtCtca**GGAT**tataaaaaaaaa  
m4a: caagatctta**TTCACATT**gaaCtGgCaTcCcGaGtggtgtacgattacaacgctcac-  
attatca**GGAT**tataaaaaaaaa  
m4b: caagatctta**TTCACATT**gaaattgaagcactattTgGgGaAgCtGaAaacgctcac-  
attatca**GGAT**tataaaaaaaaa  
m4c: caagatctta**TTCACATT**gaaattgaagcactattggtgtacgattacCaAgAtAaA-  
aGtCtca**GGAT**tataaaaaaaaa  
4\_mBS: caagatctta**T**G**CACATT**gaaattgaagcactattggtgtacgattacaacgctcac-  
attatca****T**TAT**tataaaaaaaaa

5\_wt: ttatca**GGAT**tataaaaaaaaaaggtgatagtaattcagcagcactttgt**AACCACA**aatata  
m5abc: ttatca**GGAT**tataaCaCaCaTgGgCtCgGaCtGcCgAaAgCcAttgt**AACCACA**aatata  
m5a: ttatca**GGAT**tataCaCaCaCgTtgatagtaattcagcagcactttgt**AACCACA**aatata  
m5b: ttatca**GGAT**tataaaaaaaaaaggtTaGaTtCaGtAagcagcactttgt**AACCACA**aatata  
m5c: ttatca**GGAT**tataaaaaaaaaaggtgatagtaattcaTcCcTaAtGtgt**AACCACA**aatata  
5mBS: ttatca****T**TAT**tataaaaaaaaaaggtgatagtaattcagcagcactttgt****A**A**A**ACA**aatata

6a\_wt: cagattactc**CGTGAGTA**caacgtaagtcgggtgaagccaga**AACCACA**aatcaagttg  
m6a: cagattactc**CGTGAGTA**caacTtCaTtAgTgGgCaTcAaga**AACCACA**aatcaagttg  
6a\_mBS: cagattactc**CGTG**A**CTA**caacgtaagtcgggtgaagccaga****A**A**A**ACA**aatcaagttg

Gel shift reactions were assembled on ice and contained 1 µl 10X Gel Shift Buffer (0.1 M Tris-HCl pH 7.5, 0.5 M NaCl, 10 mM DTT, 10 mM EDTA, 275 µg/ml salmon sperm DNA), 1 µl poly d(I-C) (1 mg/ml), 1 µl DTT (100 µM), 1 µl labeled probe, 1 µl competitor (if included), and protein and dH<sub>2</sub>O to a final volume of 10 µl. Lozenge gel shift reactions contained 3 µl of TNT reaction, while Su(H) gel shift reactions contained 5 µl of purified 6XHis-Su(H). Gel shift reactions were incubated on ice for 15 min before being loaded into 5% or 6% acrylamide gels that had been pre-run for 30 min; gels were then run at 120-140V in 0.5X TBE. Gels were dried for one hour at 80°C, exposed overnight to a storage phosphor screen (GE), and scanned using a Typhoon 9400 Variable Mode Imager. Quantification was performed using ImageJ. Calculations of competition were based on measurements of mean signal from which background had been subtracted.



## Complete Sequences of Enhancer Constructs

Blue indicates Lz binding sites; red, Su(H) binding sites; and green, Ets (Pnt/Yan) binding sites, as determined by Flores et al. (2000). Wild-type *sparkling* sequences, outside of Lz, Su(H), and Ets binding sites, are in lower case. Where lower case alternates with capitalized sequence, mutated bases (in caps) are subjected to non-complementary transversions.

### From Figure 1:

#### spa(wt)

gtatcaagtaactgggtgcctaattgaaaaaatttactatGACCGCAaagctgtTTCCTgactatgacatagtttttt  
ttgcttttgggtTGTGGGATgtaaattgggtcattggaactggacgctgtccctgtcTTCTCACTaagttaatgatcgtaca  
acctcaagatcttaTTCACATTgaaattgaagcactattgggtgtacgattacaacgctcacattatcaGGATataaaa  
aaaaggtgatagtaattcagcagcactttgtAACCACAaataTATGGGAAcacagattactcCGTGAGTAcacgtaa  
gtcgggtgaagccagaAACCACAaatcaagttggtTTCGggtagcttagg

#### spa(synth<sup>CS</sup>)

tGACCGCAaCgAtTtTTCCTaAtCtGtTgtTGTGGGATgGaCaGgGcCttggaacGgATCcAtTtcTTCTCACTaCg  
TtCaGcGtaTTCACATTgCaCtGtGaGcaGGATaGaCaGAAttCtAACCACAaCtaTATGGGAAcCcCgCtGaAcCGT  
GAGTAcCaAgGgAcCgaAACCACAaCtAaCgGtTttTTCGg

#### spa(synth<sup>NS</sup>)

gGaGcCaTtCaAtTgTtTcAtCaGtTaCaCaCtGtCctatGACCGCAaagAtgtTTCCTgacGaGgCcCtCgGtGtGt  
GtTcGtGgggtTGTGGGATgtaaCtTgGcattggaactggCcTcGgGcAcGgtcTTCTCACTaagtGaCtTaGcTtCcC  
aAcGcCaTaGcttaTTCACATTgaaaGtTaCgAaAtCtGgTtTtCcTaGtCcCaAgAtAaAaGtCtcaGGATataaCa  
CaCaTgGgCtCgGaCtGcCgAaAgCcAttgtAACCACAaataTATGGGAAcacaTaGtCctcCGTGAGTAcacTtCa  
TtAgTgGgCaTcAagaAACCACAaatcCaTtGgttTTCGggtatcGtCgT

### From Figure 2:

#### spa( $\Delta$ 1)

tGACCGCAaagctgtTTCCTgactatgacatagtttttttttggcttttgggtTGTGGGATgtaaattgggtcattggaactgg  
acgctgtccctgtcTTCTCACTaagttaatgatcgtacaacctcaagatcttaTTCACATTgaaattgaagcactatt  
gggtgacgattacaacgctcacattatcaGGATataaaaaaaaggtgatagtaattcagcagcactttgtAACCACAa  
ataTATGGGAAcacagattactcCGTGAGTAcacgtaagtcgggtgaagccagaAACCACAaatcaagttggtTTCG  
ggtagcttagg

#### spa( $\Delta$ 2)

gtatcaagtaactgggtgcctaattgaaaaaatttactatGACCGCAaCgAtTtTTCCTaGAattCTgtTGTGGGAT  
gGaCaGgGcCttggaactggacgctgtccctgtcTTCTCACTaagttaatgatcgtacaacctcaagatcttaTTCAC  
ATTgaaattgaagcactattgggtgacgattacaacgctcacattatcaGGATataaaaaaaaggtgatagtaattca  
gcagcactttgtAACCACAaataTATGGGAAcacagattactcCGTGAGTAcacgtaagtcgggtgaagccagaAAC  
CACAAaatcaagttggtTTCGggtagcttagg

#### spa( $\Delta$ 3)

gtatcaagtaactgggtgcctaattgaaaaaatttactatGACCGCAaagctgtTTCCTgactatgacatagtttttt  
ttgcttttgggtTGTGGGATgtaaattgggtcattggaacGTcTcAtTtcTTCTCACTaCggAaTtcGtaTTCACATTgaa  
attgaagcactattgggtgtacgattacaacgctcacattatcaGGATataaaaaaaaggtgatagtaattcagcagca  
cctttgtAACCACAaataTATGGGAAcacagattactcCGTGAGTAcacgtaagtcgggtgaagccagaAACCACAa  
tcaagttggtTTCGggtagcttagg

### spa( $\Delta 4$ )

gtatcaagtaactgggtgcctaattgaaaaaatttactatGACCGCAaagctgtTTCCTgactatgacatagttttt  
ttgctttgggtTGTGGGATgtaaattgggtcattggaactggacgctgtccctgtcTTCTCACTaagttaatgatcgta  
acctcaagatcttaTTCACATTgCaGAAttCGCaGGATataaaaaaagggtgatagtaattcagcagcactttgtAAC  
CACAaataTATGGGAAcacagattactcCGTGAGTAcacagtaagtcgggtgaagccagaAACCACAaatcaagttgt  
tTCCggtagcttagg

### spa( $\Delta 5$ )

gtatcaagtaactgggtgcctaattgaaaaaatttactatGACCGCAaagctgtTTCCTgactatgacatagttttt  
ttgctttgggtTGTGGGATgtaaattgggtcattggaactggacgctgtccctgtcTTCTCACTaagttaatgatcgta  
acctcaagatcttaTTCACATTgaaattgaagcactattgggtgtacgattacaacgctcacattatcaGGATaGaCaG  
AAttCtAACCACAaCtaTATGGGAACcCgCtGaAtcCGTGAGTAcacagtaagtcgggtgaagccagaAACCACAaa  
tcaagttggttTCCggtagcttagg

### spa( $\Delta 6$ )

gtatcaagtaactgggtgcctaattgaaaaaatttactatGACCGCAaagctgtTTCCTgactatgacatagttttt  
ttgctttgggtTGTGGGATgtaaattgggtcattggaactggacgctgtccctgtcTTCTCACTaagttaatgatcgta  
acctcaagatcttaTTCACATTgaaattgaagcactattgggtgtacgattacaacgctcacattatcaGGATataaaa  
aaaagggtgatagtaattcagcagcactttgtAACCACAaataTATGGGAAcacagattactcCGTGAGTAcCaAgGgA  
cCgaAACCACAaCtAaCgGtTttTCCgtctaga

### spa(m2<sup>NS</sup>)

gtatcaagtaactgggtgcctaattgaaaaaatttactatGACCGCAaagAtgtTTCCTgacGaGgCcCtCgGtGtGt  
GtTcGtGggtTGTGGGATgtaaCtTgGcattggaactggacgctgtccctgtcTTCTCACT...

### spa(m4<sup>NS</sup>)

gtatcaagtaactgggtgcctaattgaaaaaatttactatGACCGCAaagctgtTTCCTgactatgacatagttttt  
ttgctttgggtTGTGGGATgtaaattgggtcattggaactggacgctgtccctgtcTTCTCACTaagttaatgatcgta  
acctcaagatcttaTTCACATTgaaaGtTaCgAaAtCtGgTtTtCcTaGtCcCaAgAtAaAaGtCtcaGGAT...

### spa(m5<sup>NS</sup>)

gtatcaagtaactgggtgcctaattgaaaaaatttactatGACCGCAaagctgtTTCCTgactatgacatagttttt  
ttgctttgggtTGTGGGATgtaaattgggtcattggaactggacgctgtccctgtcTTCTCACTaagttaatgatcgta  
acctcaagatcttaTTCACATTgaaattgaagcactattgggtgtacgattacaacgctcacattatcaGGATataaCa  
CaCaTgGgCtCgGaCtGcCgAaAgCcAttgtAACCACAaataTATGGGAAcacaTaGtCctcCGTGAGTA...

### spa(m6a<sup>NS</sup>)

gtatcaagtaactgggtgcctaattgaaaaaatttactatGACCGCAaagctgtTTCCTgactatgacatagttttt  
ttgctttgggtTGTGGGATgtaaattgggtcattggaactggacgctgtccctgtcTTCTCACTaagttaatgatcgta  
acctcaagatcttaTTCACATTgaaattgaagcactattgggtgtacgattacaacgctcacattatcaGGATataaaa  
aaaagggtgatagtaattcagcagcactttgtAACCACAaataTATGGGAAcacagattactcCGTGAGTAcacTtCa  
TtAgTgGgCaTcAagaAACCACAaatcaagttggtTCCggtagcttagg

## **From Figure 3:**

### spa(m1a<sup>NS</sup>)

gGaGcCaTtCactgggtgcctaattgaaaaaatttactatGACCGCA...

### spa(m1b<sup>NS</sup>)

gtatcaagtaacGgTgGgAcGaattgaaaaaatttactatGACCGCA...

### spa(m1c<sup>NS</sup>)

gtatcaagtaactgggtgcctaCtGgCaCaCatttactatGACCGCA...

### spa(m4a<sup>NS</sup>)

gtatcaagtaactgggtgcctaattgaaaaaatttactatGACCGCAaagctgtTTCCTgactatgacatagttttt  
ttgctttgggtTGTGGGATgtaaattgggtcattggaactggacgctgtccctgtcTTCTCACTaagttaatgatcgta  
acctcaagatcttaTTCACATTgaaCtGgCaTcCcGaGtgggtgtacgattacaacgctcacattatcaGGAT...

### spa(m4b<sup>NS</sup>)

gtatcaagtaactgggtgcctaattgaaaaaatttactatGACCGCAaagctgtTTCCTgactatgacatagttttt  
ttgctttgggtTGTGGGATgtaaattgggtcattggaactggacgctgtccctgtcTTCTCACTaagttaatgatcgta  
acctcaagatcttaTTCACATTgaaattgaagcactattTgGgGaAgCtGaAaacgctcacattatcaGGAT...

### spa(m4c<sup>NS</sup>)

gtatcaagtaactgggtgcctaattgaaaaaatttactatGACCGCAaagctgtTTCCTgactatgacatagtttttt  
ttgctttgggtTGTGGGATgtaaattgggtcattggaactggacgctgtccctgtcTTCTCACTaagttaatgatcgta  
acctcaagatcttaTTACATTgaaattgaagcactattgggtgtacgattacCaAgAtAaAaGtCtcaGGAT...

### spa(m5a<sup>NS</sup>)

gtatcaagtaactgggtgcctaattgaaaaaatttactatGACCGCAaagctgtTTCCTgactatgacatagtttttt  
ttgctttgggtTGTGGGATgtaaattgggtcattggaactggacgctgtccctgtcTTCTCACTaagttaatgatcgta  
acctcaagatcttaTTACATTgaaattgaagcactattgggtgtacgattacaacgctcacattatcaGGATataCaC  
aCaCgTtgatagtaattcagcagcactttgtAACCACA...

### spa(m5b<sup>NS</sup>)

gtatcaagtaactgggtgcctaattgaaaaaatttactatGACCGCAaagctgtTTCCTgactatgacatagtttttt  
ttgctttgggtTGTGGGATgtaaattgggtcattggaactggacgctgtccctgtcTTCTCACTaagttaatgatcgta  
acctcaagatcttaTTACATTgaaattgaagcactattgggtgtacgattacaacgctcacattatcaGGATataaaa  
aaaaggtTaGaTtCaGtAagcagcactttgtAACCACA...

### spa(m5c<sup>NS</sup>)

gtatcaagtaactgggtgcctaattgaaaaaatttactatGACCGCAaagctgtTTCCTgactatgacatagtttttt  
ttgctttgggtTGTGGGATgtaaattgggtcattggaactggacgctgtccctgtcTTCTCACTaagttaatgatcgta  
acctcaagatcttaTTACATTgaaattgaagcactattgggtgtacgattacaacgctcacattatcaGGATataaaa  
aaaaggtgatagtaattcaTcCcTaAtGtGtAACCACA...

### spa(m5d<sup>NS</sup>)

gtatcaagtaactgggtgcctaattgaaaaaatttactatGACCGCAaagctgtTTCCTgactatgacatagtttttt  
ttgctttgggtTGTGGGATgtaaattgggtcattggaactggacgctgtccctgtcTTCTCACTaagttaatgatcgta  
acctcaagatcttaTTACATTgaaattgaagcactattgggtgtacgattacaacgctcacattatcaGGATataaaa  
aaaaggtgatagtaattcagcagcactttgtAACCACAaataTATGGGAACacCgCtGactcCGTGAGTA...

### spa(m6b<sup>NS</sup>)

gtatcaagtaactgggtgcctaattgaaaaaatttactatGACCGCAaagctgtTTCCTgactatgacatagtttttt  
ttgctttgggtTGTGGGATgtaaattgggtcattggaactggacgctgtccctgtcTTCTCACTaagttaatgatcgta  
acctcaagatcttaTTACATTgaaattgaagcactattgggtgtacgattacaacgctcacattatcaGGATataaaa  
aaaaggtgatagtaattcagcagcactttgtAACCACAaataTATGGGAACacagattactcCGTGAGTAcacgtaa  
gtcgggtgaagccagaAACCACAaatcCaTtGgttTTCGggtatcGtagg

## **From Figure 5:**

Mutated bases are bold and underlined.

### spa(KO)

gtatcaagtaactgggtgcctaattgaaaaaatttactatGAAAGCAaagctgtTAAtgactatgacatagtttttt  
ttgctttgggtTGTGGCATgtaaattgggtcattTTaactggacgctgtccctgtcTTGTCACTaagttaatgatcgta  
acctcaagatcttaTTGACATTgaaattgaagcactattgggtgtacgattacaacgctcacattatcaTTATtataaaa  
aaaaggtgatagtaattcagcagcactttgtAAAAACAaataTATGGCAAacagattactcCGTGACTAcaacgtaa  
gtcgggtgaagccagaAAAAACAaatcaagttgTTTTTaaggtagcttagg

### spa(KO+synth<sup>CS</sup>)

gtatcaagtaactgggtgcctaattgaaaaaatttactatGAAAGCAaagctgtTAAtgactatgacatagtttttt  
ttgctttgggtTGTGGCATgtaaattgggtcattTTaactggacgctgtccctgtcTTGTCACTaagttaatgatcgta  
acctcaagatcttaTTGACATTgaaattgaagcactattgggtgtacgattacaacgctcacattatcaTTATtataaaa  
aaaaggtgatagtaattcagcagcactttgtAAAAACAaataTATGGCAAacagattactcCGTGACTAcaacgtaa  
gtcgggtgaagccagaAAAAACAaatcaagttgTTTTTaaggtagcttaggCTCGAGtGACCGCAaCgAtTtTTCCTa  
AtCtGtTgtTGTGGGATgGaCaGgGcCttggaacGgATCcAtTtTCTCACTaCgTtCaGcGtaTTCACATTgCaCt  
GtGaGcaGGATaGaCaGAAttCtAACCACAaCtaTATGGGAACcCgCtGaAcCGTGAGTAcCaAgGgAcCgaAACCA  
CAaCtAaCgGtTttTTCGg

### spa(KO+synth<sup>NS</sup>)

gtatcaagtaactgggtgcctaattgaaaaaatttactatGAAAGCAaagctgtTAAtgactatgacatagtttttt  
ttgctttgggtTGTGGCATgtaaattgggtcattTTaactggacgctgtccctgtcTTGTCACTaagttaatgatcgta  
acctcaagatcttaTTGACATTgaaattgaagcactattgggtgtacgattacaacgctcacattatcaTTATtataaaa  
aaaaggtgatagtaattcagcagcactttgtAAAAACAaataTATGGCAAacagattactcCGTGACTAcaacgtaa  
gtcgggtgaagccagaAAAAACAaatcaagttgTTTTTaaggtagcttaggCTCGAGgGaGcCaTtCaAtTgTtTcAtC

aGtTaCaCaCtGtCctatGACCGCAaagAtgtTTCCTgacGaGgCcCtCgGtGtGtGtTcGtGggtTGTGGGATgtaa  
CtTgGcattggaactggCcTcGgGcAcGgtcTTCTCACTaagtGacTtTaGcTtCcCaAcGcCaTaGcttaTTCACATT  
gaaaGtTaCgAaAtCtGgTtTtCcTaGtCcCaAgAtAaAaGtCtcaGGATataaCaCaCaTgGgCtCgGaCtGcCgAa  
AgCcAttgtAACCAaataTATGGGAacacaTaGtCctcCGTGAGTacaacTtCaTtAgTgGgCaTcAagaAACCA  
AaatcCaTtGggtTTCGGgtaTcGtCgT

### spa(1+4+6a+synth<sup>CS</sup>)

gtatcaagtaactgggtgcctaattgaaaaaatttactatCCTAGGAGATCTgaaattgaagcactattgggtgtacga  
ttacaacgctcacattatcaGCCGGCGGTACCcaacgtaagtcgggtgaagccagaAAAAActcgagtGACCGCAaCg  
AtTtTTCCTTaAtCtGtTgtTGTGGGATgGaCaGgGcCttggaacGgATCcAtTtcTTCTCACTaCgTtCaGcGtaTT  
CACATTgCaCtGtGaGcaGGATaGaCaGAAttCtAACCAaCtaTATGGGAacCcCgCtGaAcCGTGAGTAcCaAgG  
gAcCgaAACCAaCtAaCgGtTttTTCGg

### spa(1+4+6a+synth<sup>CS</sup>, ΔLz)

gtatcaagtaactgggtgcctaattgaaaaaatttactatCCTAGGAGATCTgaaattgaagcactattgggtgtacga  
ttacaacgctcacattatcaGCCGGCGGTACCcaacgtaagtcgggtgaagccagaAAAAActcgagtGAAAGCAaCg  
AtTtTTCCTTaAtCtGtTgtTGTGGGATgGaCaGgGcCttggaacGgATCcAtTtcTTCTCACTaCgTtCaGcGtaTT  
CACATTgCaCtGtGaGcaGGATaGaCaGAAttCtAAAACAaCtaTATGGGAacCcCgCtGaAcCGTGAGTAcCaAgG  
gAcCgaAAAACAaCtAaCgGtTttTTCGg

### spa(1+4+6a+synth<sup>CS</sup>, ΔEts)

gtatcaagtaactgggtgcctaattgaaaaaatttactatCCTAGGAGATCTgaaattgaagcactattgggtgtacga  
ttacaacgctcacattatcaGCCGGCGGTACCcaacgtaagtcgggtgaagccagaAAAAActcgagtGACCGCAaCg  
AtTtTAAAtTaAtCtGtTgtTGTGGGATgGaCaGgGcCttTaaacGgATCcAtTtcTTCTCACTaCgTtCaGcGtaTT  
CACATTgCaCtGtGaGcaTTATaGaCaGAAttCtAACCAaCtaTATGGGAacCcCgCtGaAcCGTGAGTAcCaAgG  
gAcCgaAACCAaCtAaCgGtTttTAAg

### spa[1+4+6a+synth<sup>CS</sup>, ΔSu(H)]

gtatcaagtaactgggtgcctaattgaaaaaatttactatCCTAGGAGATCTgaaattgaagcactattgggtgtacga  
ttacaacgctcacattatcaGCCGGCGGTACCcaacgtaagtcgggtgaagccagaAAAAActcgagtGACCGCAaCg  
AtTtTTCCTTaAtCtGtTgtTGTGGCATgGaCaGgGcCttggaacGgATCcAtTtcTTGTCCTaCgTtCaGcGtaTT  
GACATTgCaCtGtGaGcaGGATaGaCaGAAttCtAACCAaCtaTATGGCAAacCcCgCtGaAcCGTGACTAcCaAgG  
gAcCgaAACCAaCtAaCgGtTttTTCGg

### spa(1+6a+synth<sup>CS</sup>)

gtatcaagtaactgggtgcctaattgaaaaaatttactatCCTAGGGGTACCcaacgtaagtcgggtgaagccagaAA  
aaACctcgagtGACCGCAaCgAtTtTTCCTTaAtCtGtTgtTGTGGGATgGaCaGgGcCttggaacGgATCcAtTtcT  
TCTCACTaCgTtCaGcGtaTTCACATTgCaCtGtGaGcaGGATaGaCaGAAttCtAACCAaCtaTATGGGAacCcC  
gCtGaAcCGTGAGTAcCaAgGgAcCgaAACCAaCtAaCgGtTttTTCGg

### spa(2Xsynth<sup>CS</sup>)

tGACCGCAaCgAtTtTTCCTTaAtCtGtTgtTGTGGGATgGaCaGgGcCttggaacGgATCcAtTtcTTCTCACTaCg  
TtCaGcGtaTTCACATTgCaCtGtGaGcaGGATaGaCaGAAttCtAACCAaCtaTATGGGAacCcCgCtGaAcCGT  
GAGTAcCaAgGgAcCgaAACCAaCtAaCgGtTttTTCGgctcgagtGACCGCAaCgAtTtTTCCTTaAtCtGtTgt  
TGTGGGATgGaCaGgGcCttGGAAcGgATCcAtTtcTTCTCACTaCgTtCaGcGtaTTCACATTgCaCtGtGaGcaGG  
ATaGaCaGAAttCtAACCAaCtaTATGGGAacCcCgCtGaAcCGTGAGTAcCaAgGgAcCgaAACCAaCtAaCg  
GtTttTTCGg



## SUPPLEMENTAL REFERENCES

- Andrioli, L.P., Vasisht, V., Theodosopoulou, E., Oberstein, A., and Small, S. (2002). Anterior repression of a *Drosophila* stripe enhancer requires three position-specific mechanisms. *Development* 129, 4931-4940.
- Arnosti, D.N., Barolo, S., Levine, M., and Small, S. (1996). The *eve* stripe 2 enhancer employs multiple modes of transcriptional synergy. *Development* 122, 205-214.
- Halfon, M.S., Carmena, A., Gisselbrecht, S., Sackerson, C.M., Jiménez, F., Baylies, M.K., and Michelson, A.M. (2000). Ras pathway specificity is determined by the integration of multiple signal-activated and tissue-restricted transcription factors. *Cell* 103, 63-74.
- Kuhn, R.M., Karolchik, D., Zweig, A.S., Wang, T., Smith, K.E., Rosenbloom, K.R., Rhead, B., Raney, B.J., Pohl, A., Pheasant, M., Meyer, L., Hsu, F., Hinrichs, A.S., Harte, R.A., Giardine, B., Fujita, P., Diekhans, M., Dreszer, T., Clawson, H., Barber, G.P., Haussler, D., and Kent, W.J. (2009). The UCSC Genome Browser Database: update 2009. *Nucleic Acids Res.* 37, D755-761.
- Müller, B., and Basler, K. (2000). The repressor and activator forms of *Cubitus interruptus* control Hedgehog target genes through common generic Gli-binding sites. *Development* 127, 2999-3007.
- Nellesen, D.T., Lai, E.C., and Posakony, J.W. (1999). Discrete enhancer elements mediate selective responsiveness of *Enhancer of split* complex genes to common transcriptional activators. *Dev. Biol.* 213, 33-53.
- Small, S., Blair, A., and Levine, M. (1992). Regulation of *even-skipped* stripe 2 in the *Drosophila* embryo. *EMBO J.* 11, 4047-4057.
- Stultz, B.G., Jackson, D.G., Mortin, M.A., Yang, X., Beachy, P.A., and Hursh, D.A. (2006). Transcriptional activation by Extradenticle in the *Drosophila* visceral mesoderm. *Dev. Biol.* 290, 482-494.
- Sun, B., Hursh, D.A., Jackson, D., and Beachy, P.A. (1995). Ultrabithorax protein is necessary but not sufficient for full activation of *decapentaplegic* expression in the visceral mesoderm. *EMBO J.* 14, 520-535.
- Yang, X., van Beest, M., Clevers, H., Jones, T., Hursh, D.A., and Mortin, M.A. (2000). *decapentaplegic* is a direct target of dTcf repression in the *Drosophila* visceral mesoderm. *Development* 127, 3695-3702.
- Zaffran, S., Küchler, A., Lee, H.H., and Frasch, M. (2001). *biniou* (*FoxF*), a central component in a regulatory network controlling visceral mesoderm development and midgut morphogenesis in *Drosophila*. *Genes Dev.* 15, 2900-2915.
